# Supplementary material
Source: publisher figshare collection journal article supplement (https://tandf.figshare.com/ndownloader/files/21477567)
Supplement: Supplementary file 1 [file 21477567]

Supplement S1

**Numeric rating scale for assessing dyspnea[1,2]**

On a scale from 0 to 10

Indicate how much shortness of breath you are having right now

With 0= no shortness of breath

And 10= shortness of breath as bad as can be

Circle the number

0 1 2 3 4 5 6 7 8 9 10

**References**

1. Gift, Audrey G;Narsavage, Georgia.Validity of the numeric rating scale as a measure of dyspnea. American Journal of Critical Care; May 1998; 7, 3; 200-203

2. Bausewein C, Farquhar M, Booth S, Gysels M, Higginson IJ. Measurement of breathlessness in advanced disease: a systematic review. Respir Med. 2007. 101(3): 399-410
